# Supplementary material for: ZnO–Au@ZIF-8 core–shell nanorod arrays for ppb-level NO2 detection
Source: Royal Society of Chemistry journal article supplement (doi:10.1039/d3cc06218j), 2024-01-01
Supplement: d3cc06218j1.pdf [file d3cc06218j1.pdf]

## Supporting Information

### ZnO-Au@ZIF-8 Core-shell Nanorod Arrays for ppb-level NO<sub>2</sub> Detection

Mingqi Sun<sup>#,a</sup>, Mingyuan Wang<sup>#,b</sup>, Xin Ni<sup>c</sup>, Guiwu Liu<sup>a</sup>, Guanjun Qiao<sup>a</sup>, Shuangying Lei<sup>b</sup>,  
Mingsong Wang<sup>\*,a</sup>, Ling Bai<sup>\*,a</sup>

<sup>a</sup>*School of Materials Science and Engineering, Jiangsu University, Zhenjiang, Jiangsu Province 212013, China*

<sup>b</sup>*SEU-FEI Nano-Pico Center, Key Laboratory of MEMS of Ministry of Education, School of Electrical Science and Engineering, Southeast University, Nanjing, Jiangsu Province 210096, China*

<sup>c</sup>*Department of Gastroenterology, Affiliated Hospital of Jiangsu University, Zhenjiang, Jiangsu Province 212013, China*

<sup>#</sup>The authors contribute equally

\*Corresponding authors.

E-mail addresses: [wangms@ujs.edu.cn](mailto:wangms@ujs.edu.cn) (M. Wang); [lingmubai@ujs.edu.cn](mailto:lingmubai@ujs.edu.cn) (L. Bai).

### Author Contributions

**Mingqi Sun:** Conceptualization, Methodology, Formal analysis, Writing-original draft. **Mingyuan Wang:** Calculation, simulation. **Xin Ni:** Formal analysis. **Guiwu Liu:** Conceptualization. **Guanjun Qiao:** Methodology. **Shuangying Lei:** Methodology. **Mingsong Wang:** Methodology, Formal analysis. **Ling Bai:** Writing-review & editing.

## 1. Experimental

### 1.1. Chemical materials

The Pt-printed alumina substrate was described elsewhere [1]. The following chemicals: zinc acetate hydrate ( $\text{ZnAc}_2 \cdot 2\text{H}_2\text{O}$ , AR), zinc nitrate hexahydrate ( $\text{Zn}(\text{NO}_3)_2 \cdot 6\text{H}_2\text{O}$ , AR), ethanolamine (99 %), hexamethylenetetramine (HMTA, AR), N,N-dimethylformamide (DMF, AR), 2-methylimidazole (2-MeIM, 99 %), tetrachloroamic acid tetrahydrate ( $\text{HAuCl}_4 \cdot 4\text{H}_2\text{O}$ , AR), ethanol (99 %) and deionized water ( $\text{H}_2\text{O}$ ) (Laboratory preparation) were purchased from Sino Chem Co., Ltd. China, and used directly as received without further purification and treatment.

### 1.2. Preparation of the ZnO and ZnO-Au nanorod arrays

ZnO nanorod arrays on alumina substrate were synthesized by a modified seed-assisted hydrothermal method. ZnO seed layer was deposited on the conductive side of the substrate by immersing it in the precursor solution, and withdrawn with a speed of 100 mm/min [2]. Then the substrate with ZnO seeds was placed in a 50 mL Teflon-lined stainless autoclave with the seeded side facing down, and 40 mL aqueous solution containing  $\text{Zn}(\text{NO}_3)_2 \cdot 6\text{H}_2\text{O}$  (0.48 g) and HMTA (0.22 g) was added. The reaction was carried out at 120 °C for 100 min, and cooled to room temperature. For the ZnO-Au nanorod sample, 0.135 mL  $\text{HAuCl}_4 \cdot 4\text{H}_2\text{O}$  (10 mg/mL) was added into the aqueous solution during immersion. The above-synthesized products were washed repeatedly with deionized water and dried at 60 °C overnight. The ZnO and ZnO-Au composites were obtained by annealing at 400 °C for 5 h.

### 1.3. Preparation of the ZnO@ZIF-8 and ZnO-Au@ZIF-8 core-shell nanorod arrays

The ZnO@ZIF-8 and ZnO-Au@ZIF-8 core-shell nanorod arrays were prepared via a hydrothermal route similar with the reported study [3]. The as-prepared ZnO and

ZnO-Au nanorods grown on the alumina substrate and 2-methylimidazole (0.82 g, 0.5 M) were successively added to a Teflon-lined autoclave (25 mL) containing a mixed solvent of DMF and H<sub>2</sub>O (20 mL, V<sub>DMF</sub>: V<sub>H<sub>2</sub>O</sub>=1:1), and heated at 60 °C for 10 min. After cooling to room temperature, the product was obtained and washed with fresh DMF and H<sub>2</sub>O several times, and dried at 60 °C overnight.

#### *1.4. Characterization*

The morphologies and structures of the samples were characterized by scanning electron microscopy (SEM, FEI Nova Nano 450) and transmission electron microscopy (TEM, JEOL JEM-2100F at 200 kV). The crystalline structure and phase of the products were investigated by grazing incidence X-ray diffraction (GIXRD) on a Smartlab 9kw X-ray with Cu K $\alpha$  radiation at  $\lambda = 0.145$  nm. The elemental valence states of the samples were determined via XPS equipment (Thermo Scientific K-Alph) and C1s peak at 284.8 eV was used as the calibration value of binding energy shift.

The details of the gas sensing performance of ZnO-based materials were described in the previous study. Under the preset gas concentration and heating temperature (125 °C), the computer could monitor the resistance of the sensor. The sensor response is defined as the ratio of R<sub>g</sub>/R<sub>a</sub> (R<sub>a</sub>/R<sub>g</sub>) used to test oxidation (reduction) gas, where R<sub>a</sub> is the resistance of the sensor in dry air and R<sub>g</sub> is the resistance of the sensor in target gas. The response time and recovery time respectively correspond to the time required to obtain 90 % of the response, while the recovery time indicates the time required for the signal to recover to 90 %.

## **2. Supplementary Results**

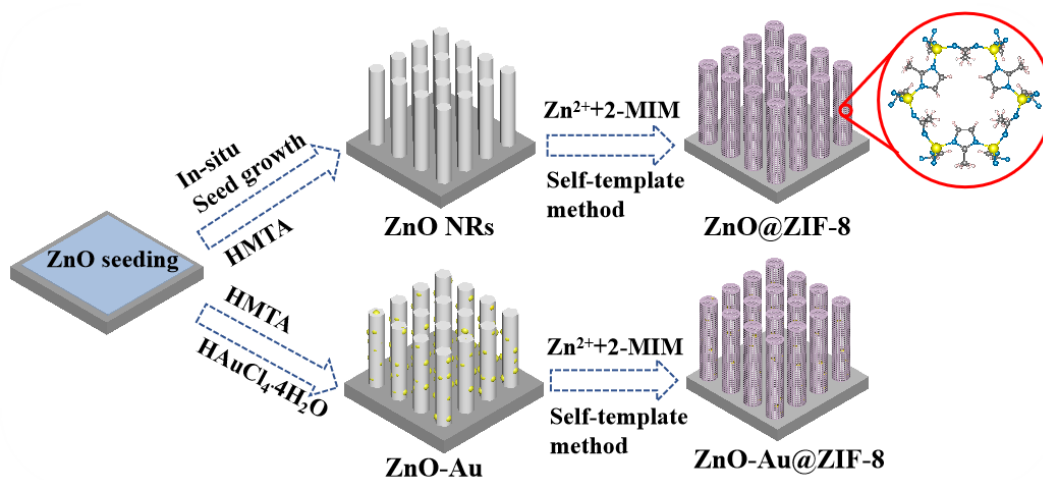

**Fig. S1.** Schematic diagram of the preparation of the ZnO@ZIF-8 and ZnO-Au@ZIF-8 core-shelled materials.

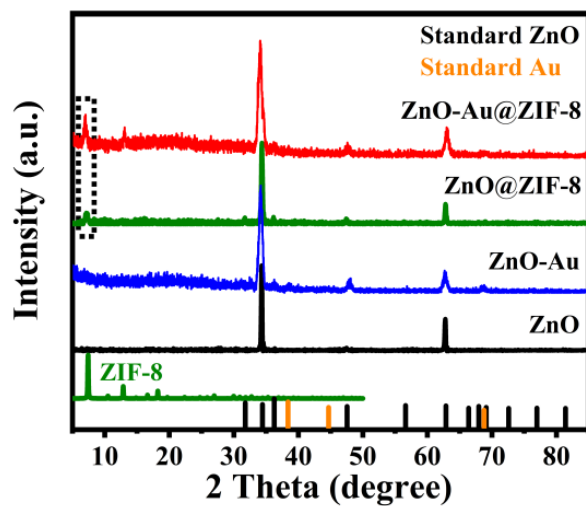

**Fig. S2.** The XRD patterns of (a) ZnO (black); (b) ZnO-Au (blue); (c) ZnO@ZIF-8 (green); (d) ZnO-Au@ZIF-8 (red) samples, respectively.

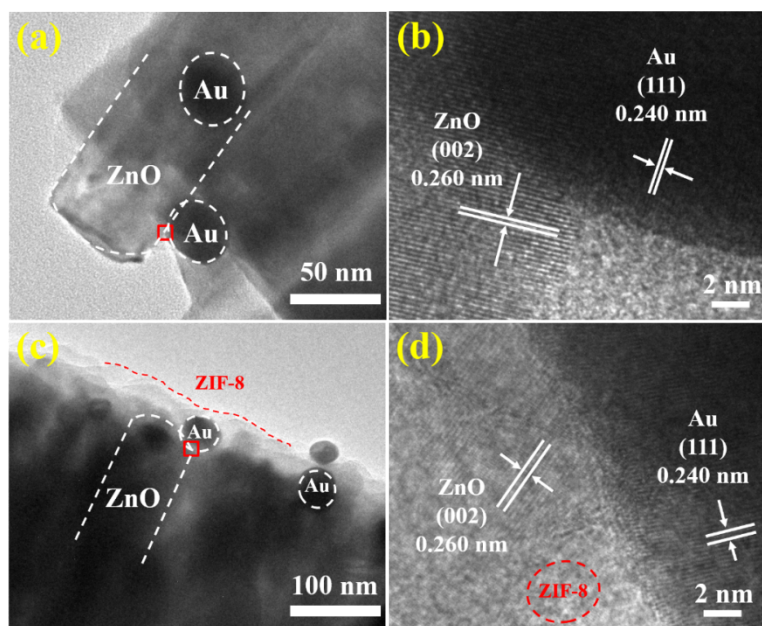

**Fig. S3.** The TEM and HRTEM images of (a,b) ZnO-Au and (c,d) ZnO-Au@ZIF-8 samples.

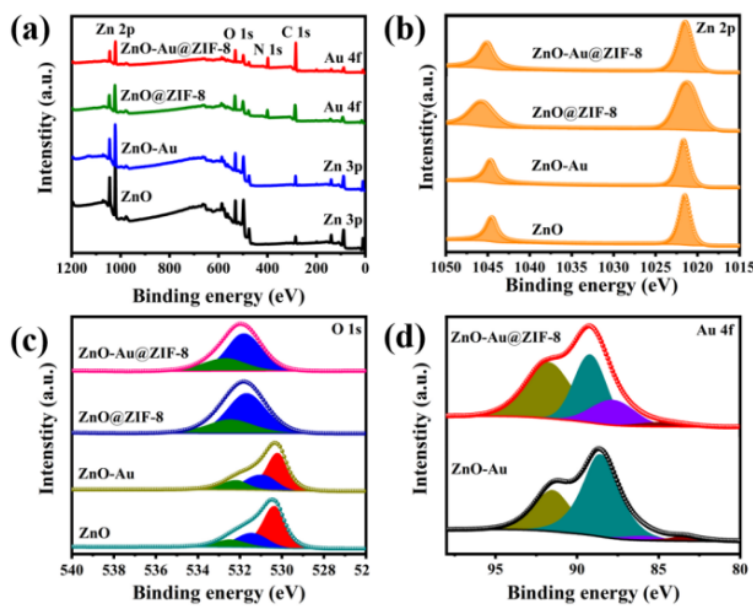

**Fig. S4.** XPS spectra of various samples: (a) survey spectrum, (b) Zn 2p, (c) O 1s and (d) Au 4f spectra.

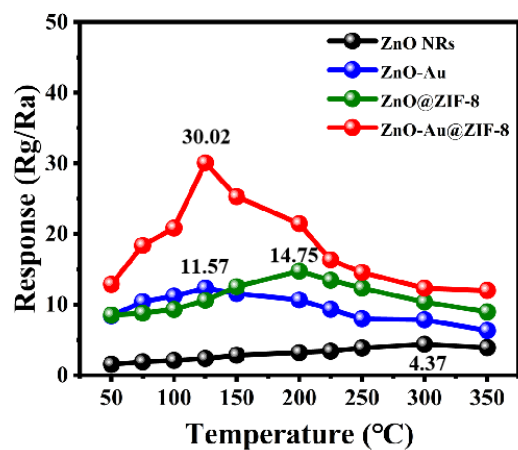

**Fig. S5.** The response of ZnO NRs, ZnO-Au, ZnO@ZIF-8 and ZnO-Au@ZIF-8 sensors to 1 ppm NO<sub>2</sub> obtained at various operating temperatures.

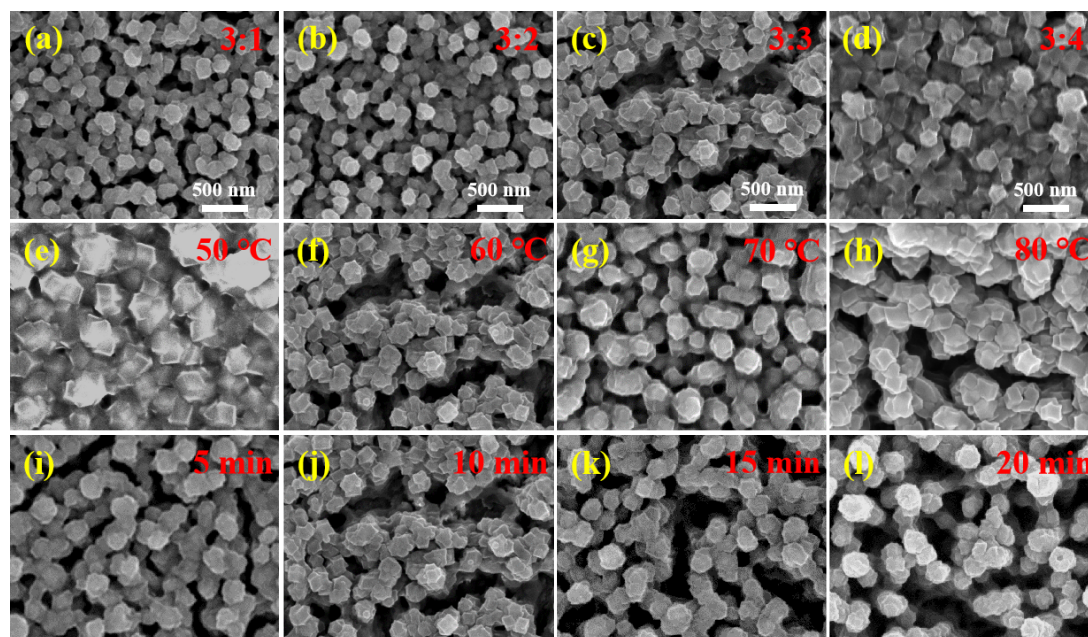

**Fig. S6.** The SEM images of ZnO@ZIF-8 composite films obtained with different DMF/ H<sub>2</sub>O volume ratios: a) 3:1; b) 1:1; c) 1:3; d) 3:4 (T= 60 °C, 10 min); ZnO@ZIF-8 composite films obtained at different reaction temperature: e) 50 °C; f) 60 °C; g) 70 °C; h) 80 °C (DMF/ H<sub>2</sub>O=1:1, 10 min); ZnO@ZIF-8 composite films obtained at different reaction time: i) 5 min; j) 10 min; k) 15 min; l) 20 min (T= 60 °C, DMF/ H<sub>2</sub>O=1:1).

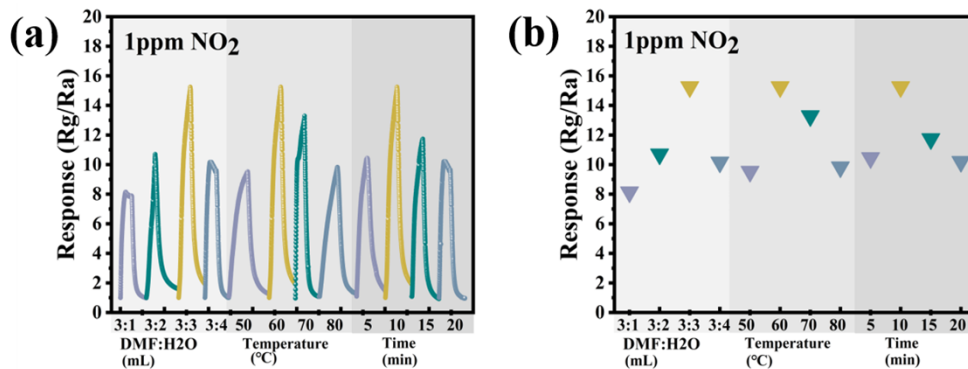

**Fig. S7.** The response of ZnO@ZIF-8 composite films obtained with different test conditions to 1 ppm NO<sub>2</sub>.

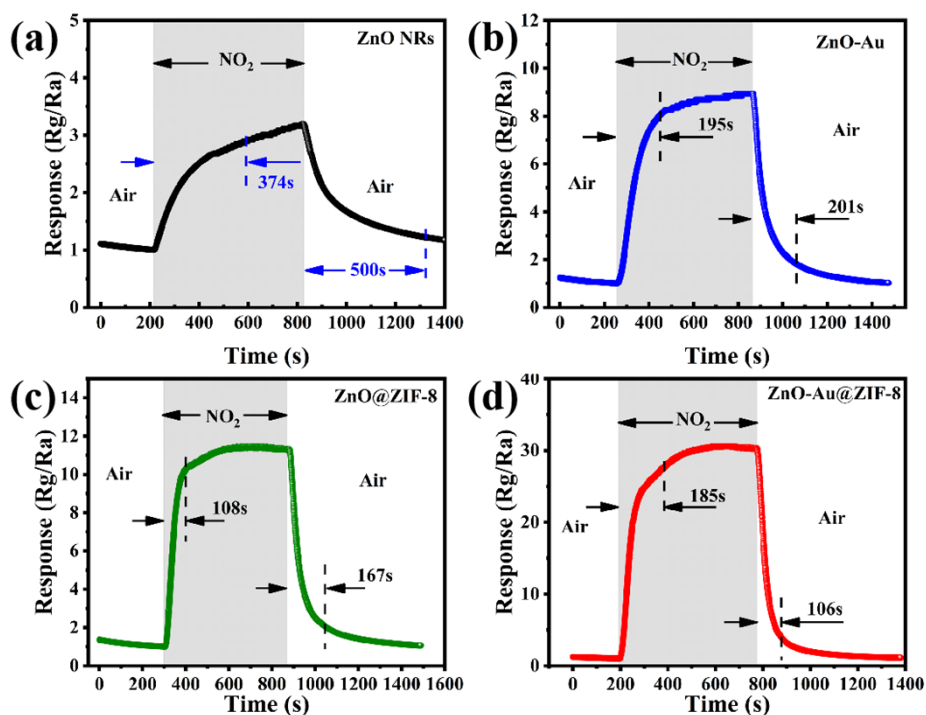

**Fig. S8.** (a-b) The dynamic response curves of ZnO NRs, ZnO-Au, ZnO@ZIF-8 and ZnO-Au@ZIF-8 sensors to 1 ppm NO<sub>2</sub> at 125 °C.

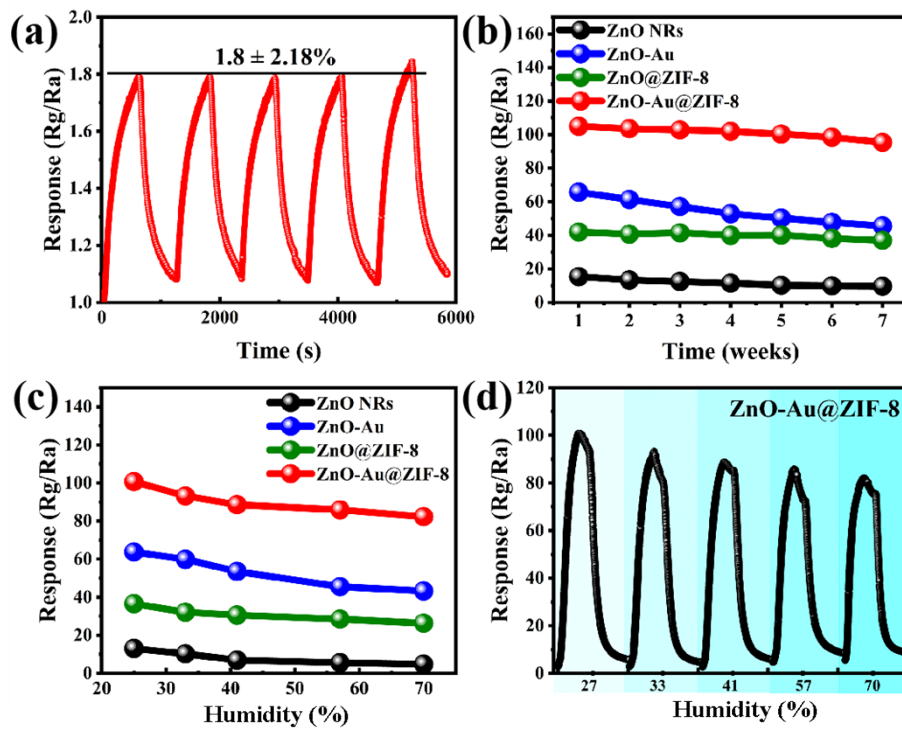

**Fig. S9.** (a) Repeatability test for ZnO-Au@ZIF-8 exposing to five-cycle 5 ppb NO<sub>2</sub> at 125 °C; (b) long-term reliability test toward 10 ppm NO<sub>2</sub> within 50 days for four ZnO-based sensors; (c) the responses to 10 ppm NO<sub>2</sub> for the four ZnO-based sensors under various RH levels; (d) dynamic response curve toward 10 ppm NO<sub>2</sub> for ZnO-Au@ZIF-8 at 125 °C under different humidity conditions.



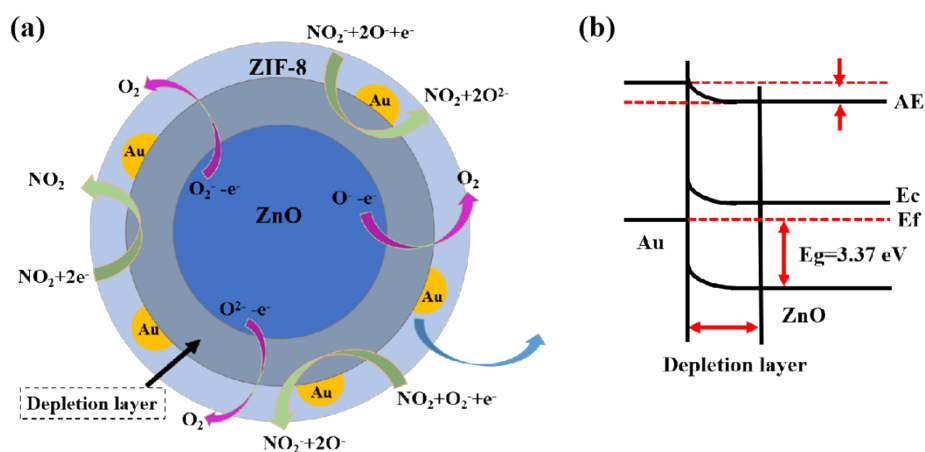

**Fig. S10.** Schematic illustration of the  $\text{NO}_2$  sensing mechanism of ZnO-Au@ZIF-8 core-shell structure.

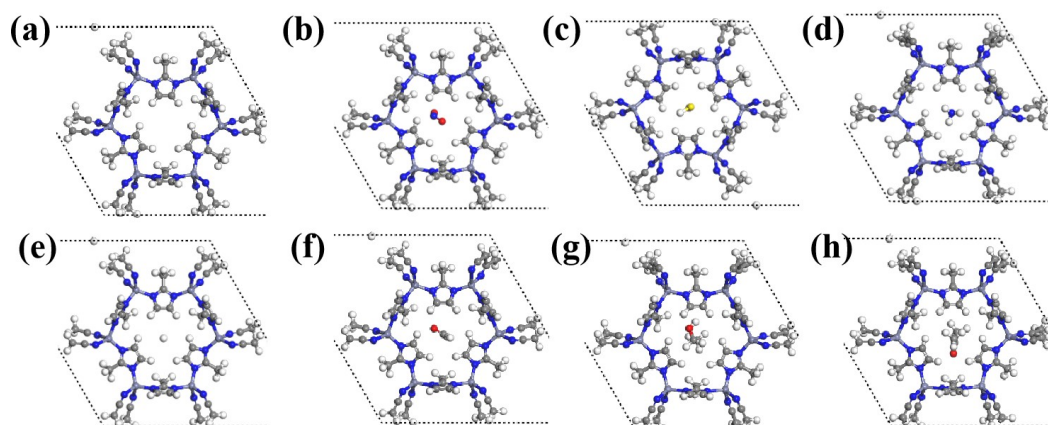

**Fig. S11.** (a) ZIF-8 intercepts molecular adsorption fragments; the theoretical binding configurations of different gas molecule on ZIF-8: (b)  $\text{NO}_2$  on ZIF-8, (c)  $\text{H}_2\text{S}$  on ZIF-8, (d)  $\text{NH}_3$  on ZIF-8, (e)  $\text{H}_2$  on ZIF-8, (f)  $\text{HCHO}$  on ZIF-8, (g)  $\text{CH}_2\text{CH}_2\text{OH}$  on ZIF-8, (h)  $\text{H}_3\text{CCOCH}_3$  on ZIF-8. The white, gray, red, blue, and yellow spheres represent H, C, O, N, and S atoms, respectively.

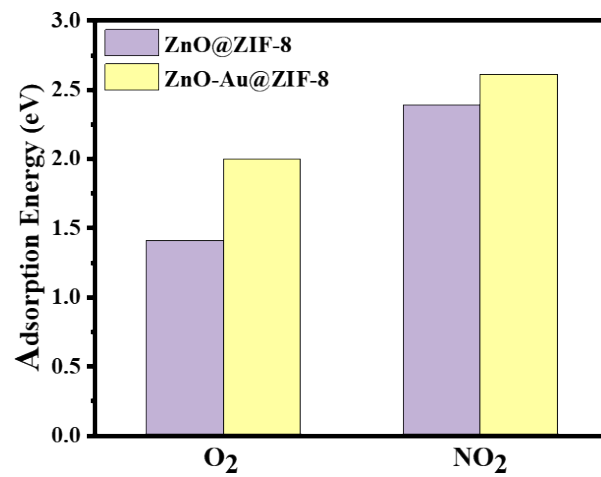

**Fig. S12.** Calculated adsorption energies of O<sub>2</sub> and NO<sub>2</sub> at ZnO@ZIF-8 and ZnO-Au@ZIF-8, respectively.

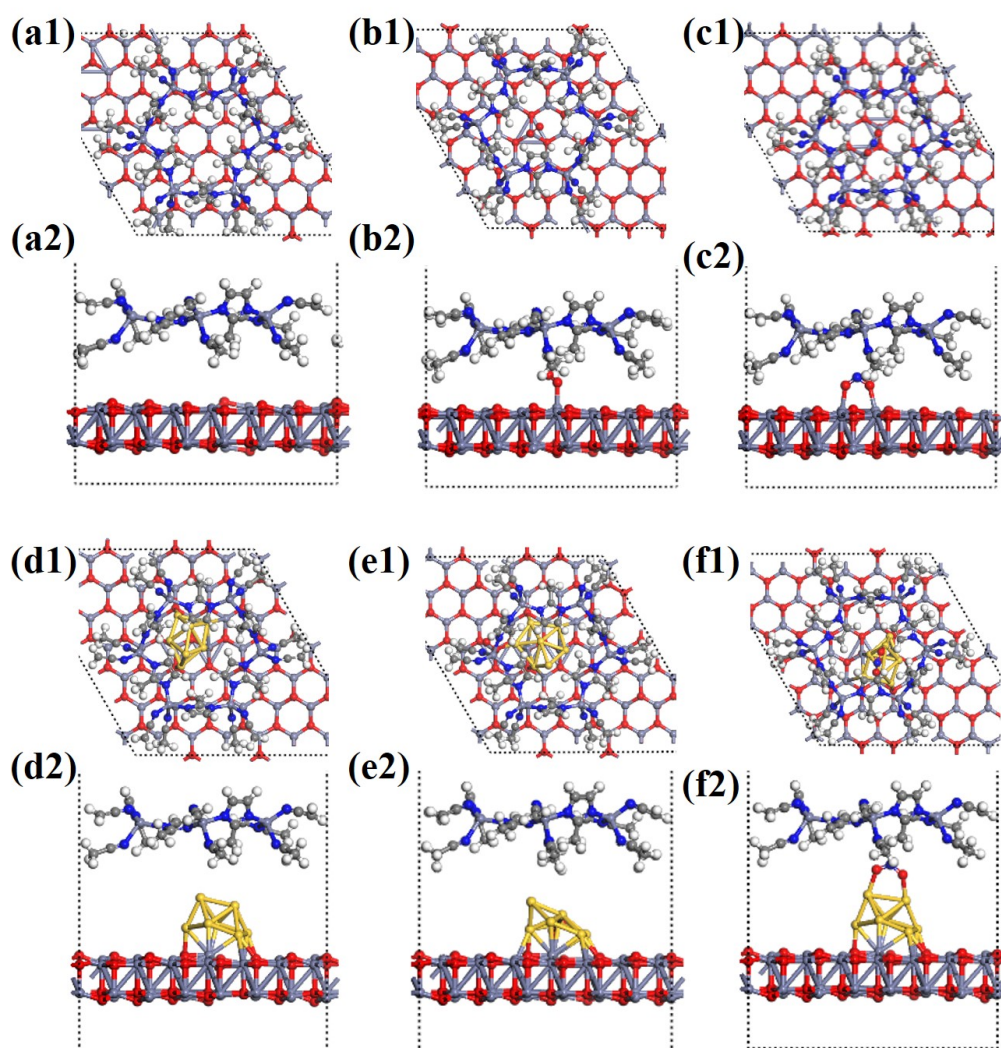

**Fig. S13.** Top and side views of the configurations for (a1, a2) ZnO@ZIF-8 composite, (b1,b2) O<sub>2</sub>-adsorbed ZnO@ZIF-8 composite, (c1,c2) NO<sub>2</sub>-adsorbed ZnO@ZIF-8 composite, (d1,d2) ZnO-Au@ZIF-8 composite, (e1,e2) O<sub>2</sub>-adsorbed ZnO-Au@ZIF-8 composite, (f1,f2) NO<sub>2</sub>-adsorbed ZnO-Au@ZIF-8 composite, obtained by DFT calculations. The white, gray, red, blue, purple and yellow spheres represent N, H, O, C, Zn and Au atoms, respectively.

| Samples      | O <sub>L</sub>   | O <sub>V</sub>   | O <sub>C</sub>   |
|--------------|------------------|------------------|------------------|
| ZnO          | 530.32 eV/57.99% | 531.44 eV/25.58% | 532.43 eV/16.43% |
| ZnO-Au       | 530.17 eV/52.67% | 530.91 eV/29.08% | 532.13 eV/18.45% |
| ZnO@ZIF-8    | /                | 531.56 eV/69.98% | 532.38 eV/30.02% |
| ZnO-Au@ZIF-8 | /                | 531.8 eV/68.62%  | 532.68 eV/31.38% |

**Table S1.** Different proportion of deconvoluted oxygen components in the ZnO, ZnO-Au, ZnO@ZIF-8, and ZnO-Au@ZIF-8 samples, respectively.

| Sensing materials                                  | Concentration  | Work temperature                      | Sensor response (R <sub>g</sub> /R <sub>a</sub> ) | References in the SI |
|----------------------------------------------------|----------------|---------------------------------------|---------------------------------------------------|----------------------|
| ZnO-Au nanowires                                   | 1 ppm          | 250 °C                                | 51.01                                             | 4                    |
| ZnO/Au                                             | 5 ppm          | Room temperature with UV illumination | 0.6                                               | 5                    |
| ZnO@Pt nanowire                                    | 20 ppm         | 220 °C                                | 7.01                                              | 6                    |
| Au/Pd-ZnO                                          | 5 ppm          | 100 °C                                | 732.4                                             | 7                    |
| ZnO-Au nanorods                                    | 5 ppm          | 300 °C                                | 1.2                                               | 8                    |
| Au nanoparticle decorated ZnO@ZIF-8 core-shell NRs | 0.05 ppm       | Room temperature with UV illumination | 260 %                                             | 10                   |
| ZnO-Au@ZIF-8                                       | 5 ppm<br>5 ppb | 125 °C                                | 63.1<br>1.8                                       | This work            |

**Table S2.** Comparison of NO<sub>2</sub> gas-sensing performance of various heterostructures.

## References

- 1, M. S. Wang, Y. W. Wang, X. J. Li, C. X. Ge, S. Hussain, G. W. Liu, G. J. Qiao, *Sens. Actuators B Chem.*, 2020, 8, 128050.
- 2, C. M. Chang, M. H. Hon, I. C. Leu, *Sens. Actuators B Chem.*, 2010, 11, 15-20.
- 3, S. S. Nair, N. Illyaskutty, B. Tam, A. O. Yazaydin, K. Emmerich, A. Steudel, T. Hashem, L. Schöttner, C. Wöll, H. Kohler, H. Gliemann, *Sens. Actuators B Chem.*, 2020, 2, 127184.
- 4, E. Navarrete, F. Güell, P. R. Martínez-Alanis, E. Llobeta, J. Alloys *Compd.*, 2021, 890, 161923.
- 5, A. Gaiardo, B. Fabbri, A. Giberti, V. Guidi, P. Bellutti, C. Malagù, M. Valt, G. Pepponi, S. Gherardi, G. Zonta, A. Martucci, M. Sturaro, N. Landini, *Sens. Actuators B Chem.*, 2016, 237, 1085-1094.
- 6, C. Y. Wang, J. Y. Xie, X. Chang, W. Zheng, J. Zhang, X. H. Liu, *Chem. Eng. J.*, 2023, 473, 145481.
- 7, X. X. Chen, Y. F. Ouyang, T. H. Liu, C. Y. Zhang, S. Y. Huang, H. R. Shang, H. Lin, S. K. Zhao, Y. B. Shen, *Vacuum*, 2024, 219, 112742.
- 8, P. Rai, Y. S. Kim, H. M. Song, M. K. Song, Y. T. Yu, *Sens. Actuators B Chem.*, 2012, 165, 133-142.
- 9, M. M. Zhan, C. X. Ge, S. Hussain, A. S. Alkorbi, R. Alsaiari, N. A. Alhemiary, G. J. Qiao, G. W. Liu, *Chemosphere*, 2022, 291, 132842.
- 10, T. Murugesan, R. R. Kumar, A. Ranjan, M. Y. Lu, N. H. Lin, *Sens. Actuators B Chem.*, 2024, 402, 135106.
